# Supplementary material for: Comparative Studies of Recirculatory Microbial Desalination Cell–Microbial Electrolysis Cell Coupled Systems
Source: MDPI journal article supplement (doi:10.3390/membranes11090661), 2021-08-27
Supplement: s1 [file s1]

## SUPPLEMENTARY

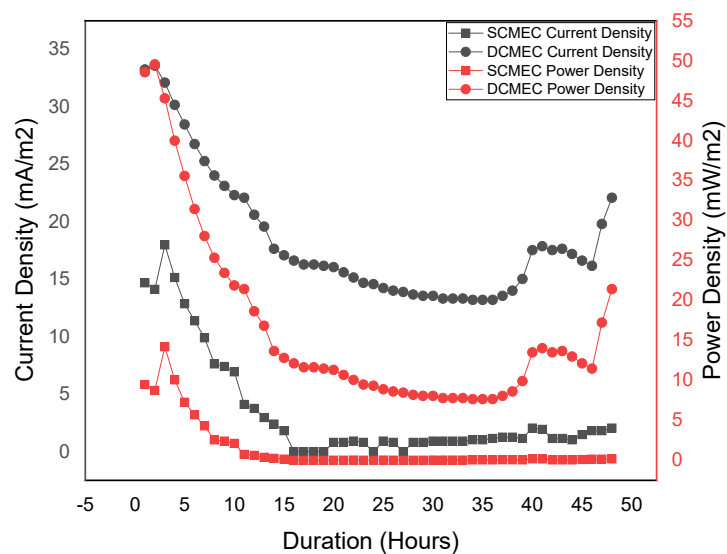

**Figure S1.** Current and Power Densities performance of the SCMEC and DCMEC at  $10\Omega$  within a 48-hour cycle.

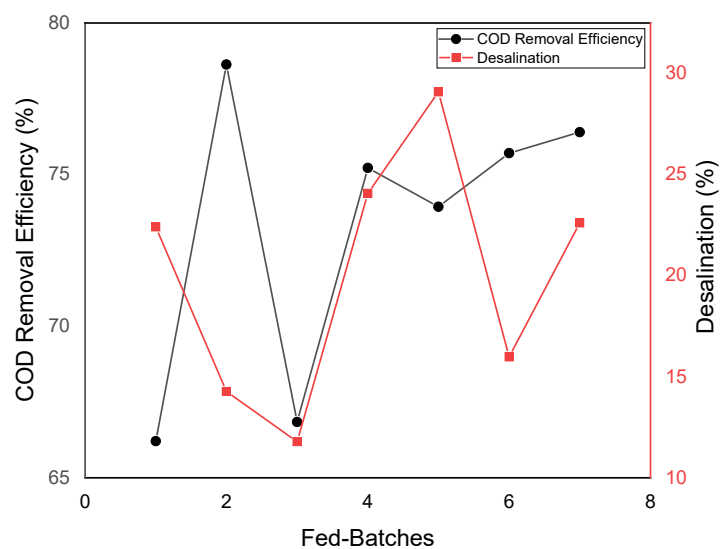

**Figure S2.** COD removal efficiencies and Desalination in MDC over 8 fed-batches as a power source to the MEC systems.
